# Supplementary material for: Purge Haplotigs: allelic contig reassignment for third-gen diploid genome assemblies
Source: Springer Nature journal article supplement (doi:10.1186/s12859-018-2485-7), 2018-11-29
Supplement: 12859_2018_2485_MOESM1_ESM.pdf [file 12859_2018_2485_MOESM1_ESM.pdf]

# Workflows for Purge Haplotigs and Analysis

## Purge Haplotigs Synthetic Dataset

The validation run on an earlier version of the pipeline, using a simulated genome and simulated PacBio subreads is archived here: <https://doi.org/10.5281/zenodo.1042847>. The current version of Purge Haplotigs (commit: `afc943c`) includes the simulation dataset which can be run at any time using the command:

```
purge_haplotigs test
```

## Purge Haplotigs Case Study: Running Purge Haplotigs

### ➤ Preparation: Mapping subreads

```
minimap2 -ax map-pb genome.fa subreads.fasta.gz \  
  | samtools view -hF 256 - \  
  | samtools sort -@ 8 -m 1G -o aligned.bam -T tmp.ali
```

Purge Haplotigs was run using a bash script for the purposes of logging memory and runtime over the course of all three commands. The cutoffs for the 'contigcov' stages were determined ahead of time.

### ➤ *Arabidopsis thaliana* purge\_haplotigs.sh run script

```
purge_haplotigs readhist -b ../aligned.bam -g ../genome.fa -t 32  
purge_haplotigs contigcov -i aligned.bam.gencov -l 10 -m 95 -h 190  
purge_haplotigs purge -g ../genome.fa -c coverage_stats.csv \  
  -t 32 -r ../repeats.bed  
touch purge_haplotigs.done
```

### ➤ *Clavicornia pyxidata* purge\_haplotigs.sh run script

```
purge_haplotigs readhist -b ../aligned.bam -g ../genome.fa -t 32  
purge_haplotigs contigcov -i aligned.bam.gencov -l 10 -m 65 -h 180  
purge_haplotigs purge -g ../genome.fa -c coverage_stats.csv \  
  -t 32 -r ../repeats.bed  
touch purge_haplotigs.done
```

### ➤ *Vitis vinifera* L. Cv. Cabernet Sauvignon purge\_haplotigs.sh run script

```
purge_haplotigs readhist -b ../aligned.bam -g ../genome.fa -t 32  
purge_haplotigs contigcov -i aligned.bam.gencov -l 10 -m 90 -h 190  
purge_haplotigs purge -g ../genome.fa -c coverage_stats.csv \  
  -t 16 -r ../repeats.bed  
touch purge_haplotigs.done
```

### ➤ *Taeniopygia guttata* purge\_haplotigs.sh run script

```
purge_haplotigs readhist -b ../aligned.bam -g ../genome.fa -t 32  
purge_haplotigs contigcov -i aligned.bam.gencov -l 10 -m 70 -h 190  
purge_haplotigs purge -g ../genome.fa -c coverage_stats.csv \  
  -t 10 -r ../repeats.bed  
touch purge_haplotigs.done
```

➤ **Memory logging script**

```
While ! [[ -e purge_haplotigs.done ]]  
do  
    free -g | awk '/Mem:/{print $3}' >> mem.log  
    sleep 1  
done
```

➤ **CPU logging script**

```
While ! [[ -e purge_haplotigs.done ]]  
do  
    mpstat 1 1 | awk '/Average/{print $3}' >> cpu.log  
    sleep 1  
done
```

➤ **Runtime logging**

```
time ( bash purge_haplotigs.sh 2> purge_haplotigs.log ) \  
2> purge_haplotigs.time
```

➤ **Redundans command (same for all assemblies)**

```
redundans.py -f ../genome.fa -t 32 --nocleaning --noscaffolding \  
--norearrangements --nogapclosing
```

## Purge Haplotigs Case Study: Illumina Paired End Short Read Mapping

Example workflow for the *C. pyxidata* Purge Haplotigs-processed assembly; the same approach was used for all assemblies with the exception of the read-depth cutoffs during SNP filtering.

### ➤ Create BWA index

```
bwa index ../purge_haplotigs/curated.fasta
```

### ➤ Map and sort

```
bwa mem ../purge_haplotigs/curated.fasta -t 24 \  
SRR1800147_1.fastq.gz SRR1800147_2.fastq.gz \  
| samtools sort -@ 8 -m 1G -o PH.bam -T ali.tmp
```

### ➤ Get stats on mapping

```
samtools flagstat PH.bam
```

### ➤ Generate a read-depth histogram to determine SNP filtering cutoffs

```
purge_haplotigs readhist -b PH.bam -g ../purge_haplotigs/curated.fasta -t 32
```

### ➤ Call variants and filter on-the-fly (heterozygous only, read-depth between 60 and 140 for *C. pyxidata*, 25 and 60 for *A. thaliana* and 20 and 50 for *T. guttata*)

```
samtools mpileup -f ../genome.fasta PH.bam \  
| java -jar Varscan.jar mpileup2snp --p-value 0.001 \  
| perl -e 'while(<>){my@l=split(/\s+/, $_);  
my @d=split(/:/, $l[4]); ($l[7]==1) && ($d[1]>60) && ($d[1]<140) &&  
(print $_);}' \  
| gzip - > PH.SNPs.tsv.gz
```

## Purge Haplotigs Case Study: Circos Plots

The workflow example and control file examples are available at:

[https://bitbucket.org/mroachawri/read\\_snp\\_circos\\_eg](https://bitbucket.org/mroachawri/read_snp_circos_eg)

## Purge Haplotigs Case Study: BUSCO Analysis

Example for FALCON Unzip primary contigs shown.

➤ *A. thaliana*

```
python run_BUSCO.py -i ../genome.p-ctg.fasta -o FALCON \  
-l /datasets/embryophyta_odb9/ -m genome -c 32 -sp arabidopsis
```

➤ *C. pyxidata*

```
python run_BUSCO.py -i ../genome.p-ctg.fasta -o FALCON \  
-l /datasets/basidiomycota_odb9/ -m genome -c 32 -sp coprinus
```

➤ *V. vinifera L. Cv. Cabernet Sauvignon*

```
python run_BUSCO.py -i ../genome.p-ctg.fasta -o FALCON \  
-l /datasets/embryophyta_odb9/ -m genome -c 32 -sp arabidopsis
```

➤ *T. guttata*

```
python run_BUSCO.py -i ../genome.p-ctg.fasta -o FALCON \  
-l /datasets/aves_odb9/ -m genome -c 32 -sp human
```

# Purge Haplotigs Case Study: MUMmer Alignments, Dotplots, Alignment Coverages

## Generic example workflow

- Calculate alignments between a reference (`ref.fa`) and a query (`query.fa`)

```
nucmer -t 32 ref.fa query.fa -p output
```

- Filter alignments (1-to-1 best) for dotplots

```
delta-filter -1 output.delta > output.1delta
```

- To make dotplots, use `mummerplot` to generate coords for plotting and a png for previewing

```
mummerplot --fat --png -large output.1delta -p output
```

- convert coords for plotting in Rstudio using `ggplot2`

```
cat output.fplot output.rplot | sed 's/^\$/NA\tNA\tNA/' > output.gpath
```

- To get the alignment statistics

```
dnadiff -d output.delta -p output  
cat output.report
```

- To generate coords for plotting stacked contig alignments to chromosomes in Rstudio using `ggplot2`, filter for best query-to-reference alignments, extract the contig alignments to the chromosome of interest (Chromosome 5), apply a y-axis offset for each chromosome.

```
delta-filter -q output.delta > output.qdelta  
show-coords -HT output.qdelta | awk '{print $8"\t"$1"\t"$2"\t"$9}' \  
  | grep Chr5 | sort -k2,2n -k3,3n > output.chr5.bed  
XOFF=0; for ii in `cat output.chr5.bed \  
  | awk '$3-$2>20000{print $4}' | sort | uniq`;  
do  
  grep $ii output.chr5.bed | awk -v xoff=$XOFF '{print  
    $2"\t"xoff"\n"$3"\t"xoff"\nNA\tNA}'; let XOFF++;  
done > output.chr5.gpath
```

- The chromosome `.gpath` files are then loaded into Rstudio for plotting and an SVG file is exported. Horizontal bars are drawn over the alignments and coloured in inkscape.
