# Supplementary material for: Purge Haplotigs: allelic contig reassignment for third-gen diploid genome assemblies
Source: Springer Nature journal article supplement (doi:10.1186/s12859-018-2485-7), 2018-11-29
Supplement: 12859_2018_2485_MOESM4_ESM.pdf [file 12859_2018_2485_MOESM4_ESM.pdf]

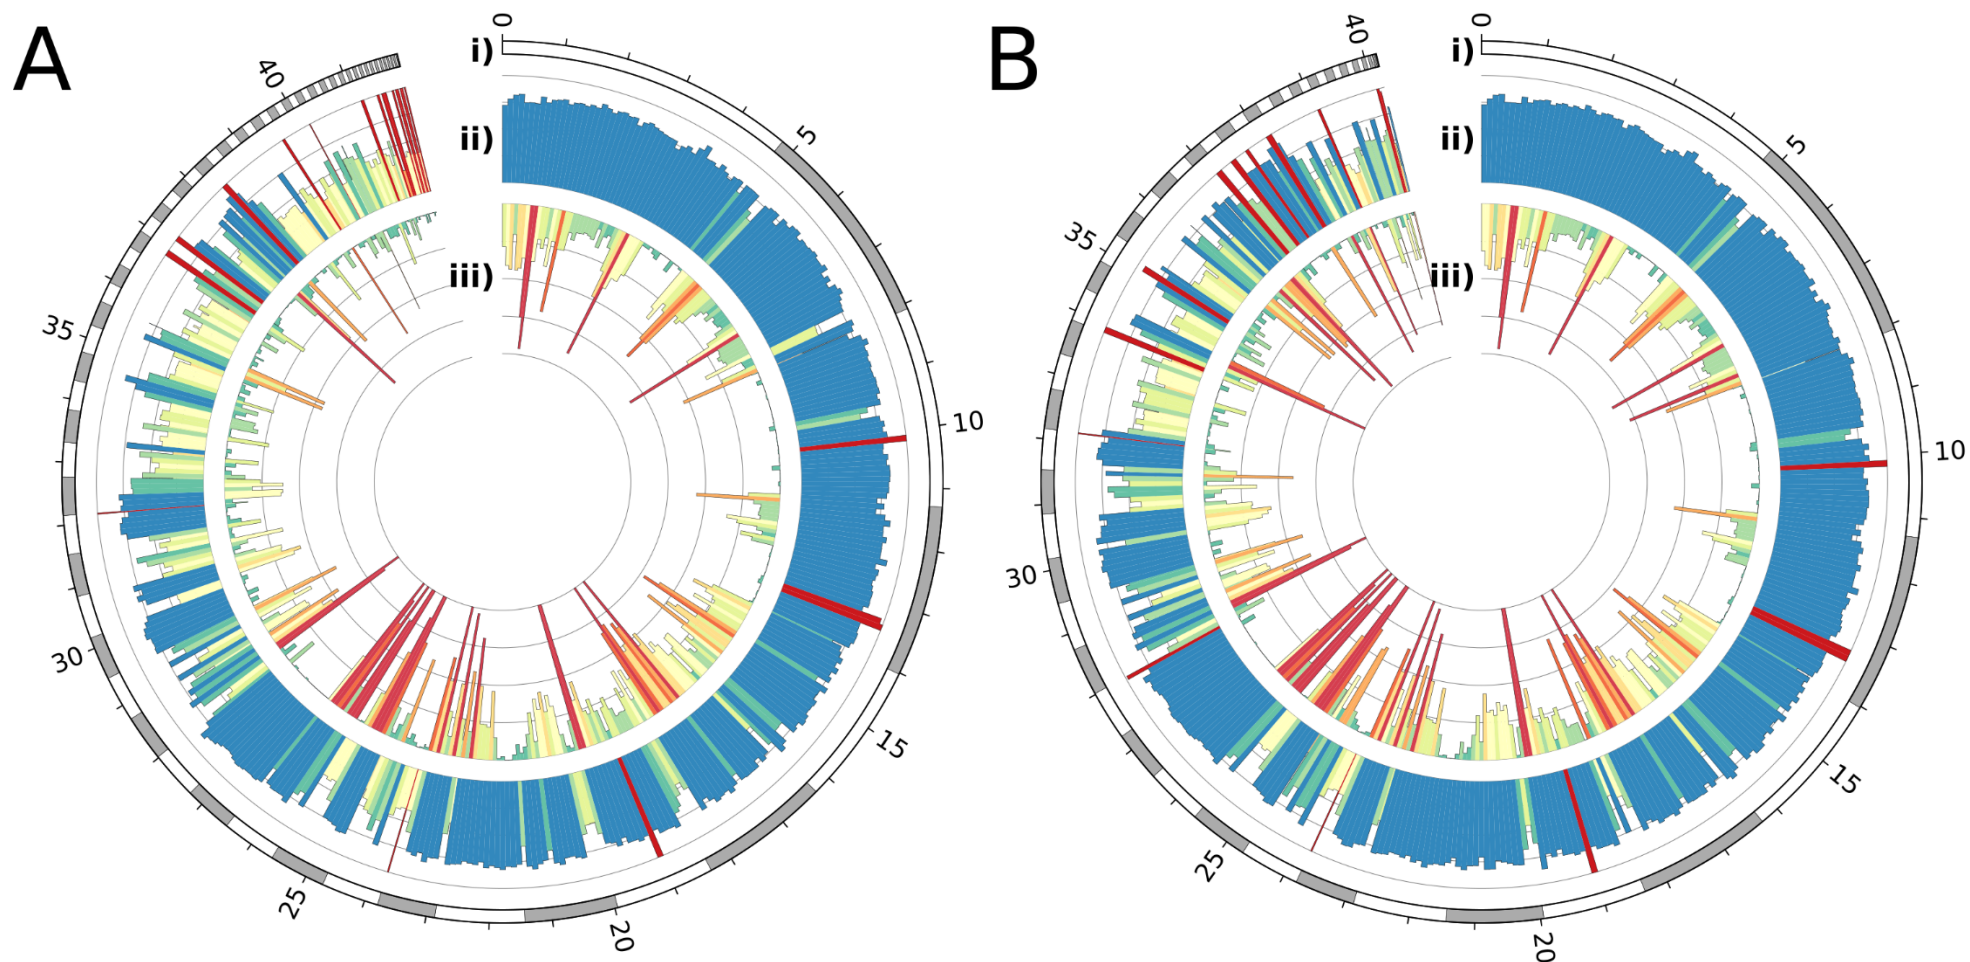

**Circos plots for *Clavicornona pyxidata* haploid assemblies.** Illumina PE reads were mapped, and heterozygous SNPs were called for the draft FALCON Unzip assembly (A) and the assembly curated with Purge Haplotigs (B). The tracks shown in the circos plots are: Contigs (ordered by length) (i), Read-depth histogram (reads per genome window; blue: median read-depth, yellow: half read-depth, red: very low/high read-depth) (ii), and SNP density (SNPs per genome window; blue: low SNP density, red: high SNP density) (iii). There were 162.5, 175.6, and 145.0 thousand filtered heterozygous SNP calls for the draft, Purge Haplotigs-processed, and Redundans-processed assemblies respectively.

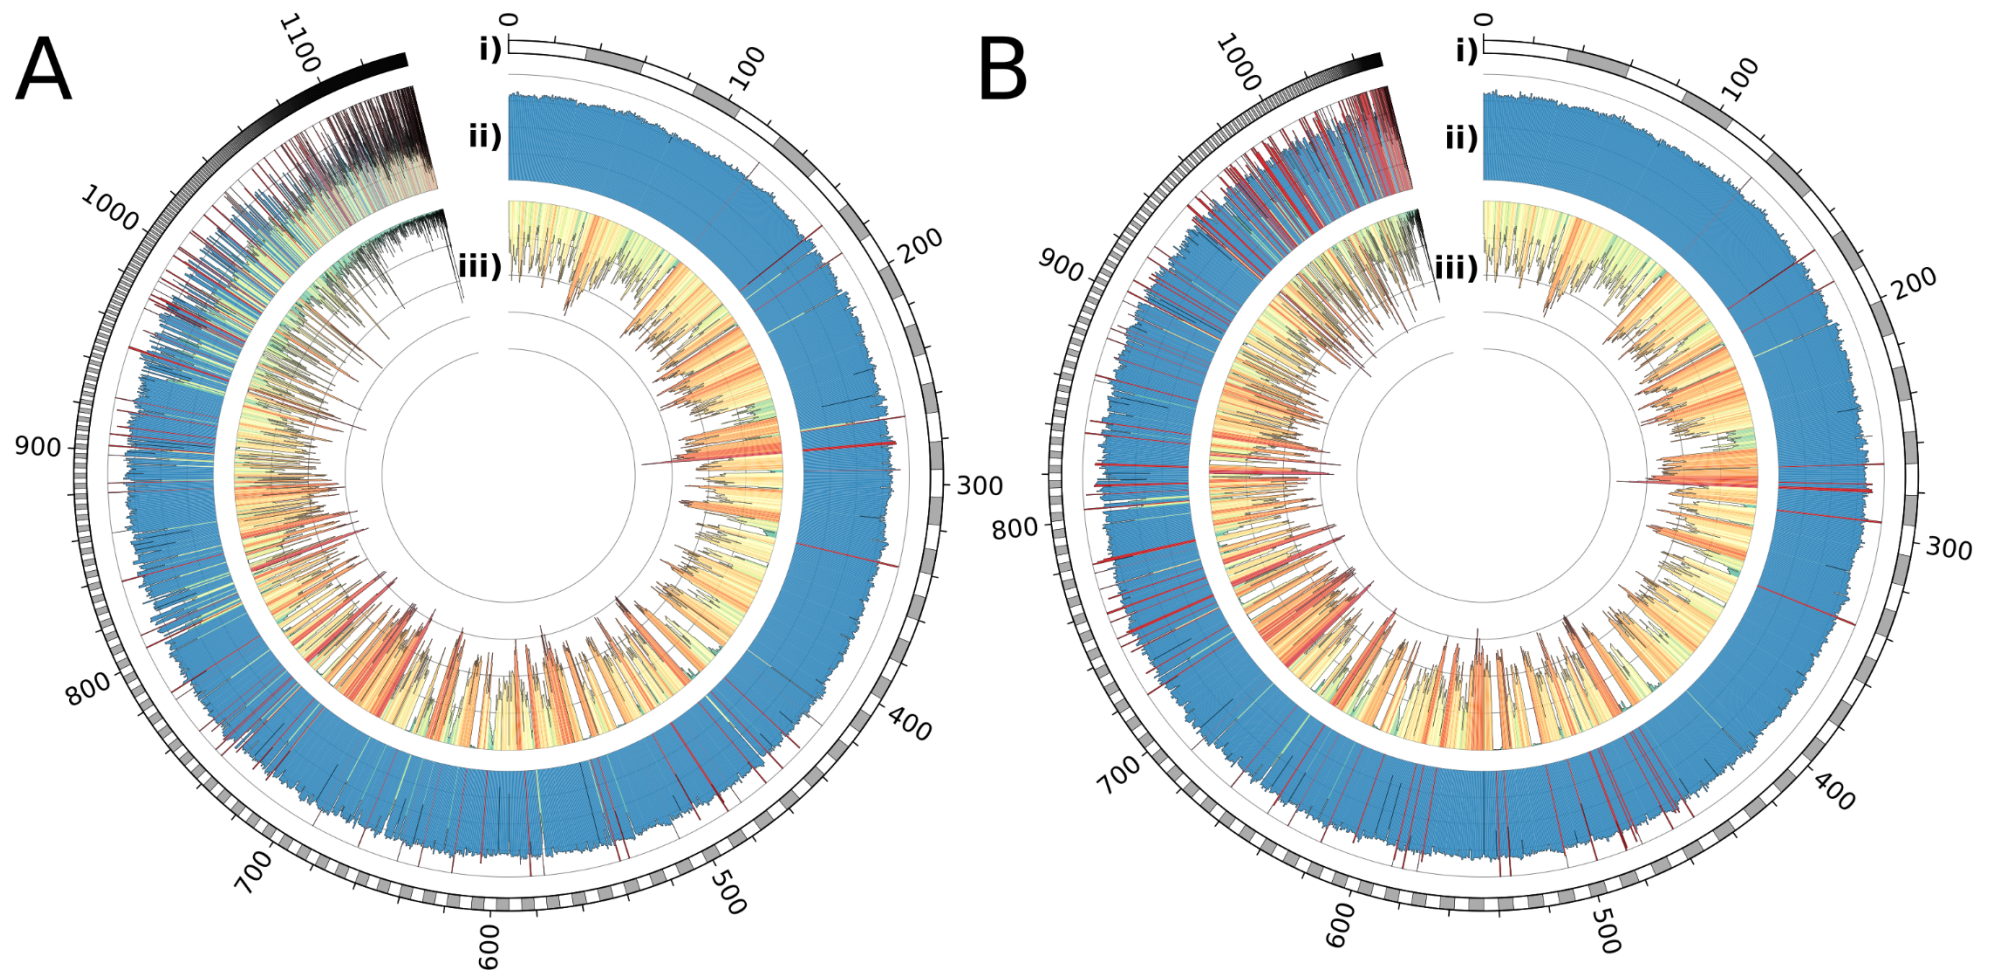

**Circos plots for *Taeniopygia guttata* haploid assemblies.** Illumina PE reads were mapped, and heterozygous SNPs were called for the draft FALCON Unzip assembly (A) and the assembly curated with Purge Haplotigs (B). The tracks shown in the circos plots are: Contigs (ordered by length) (i), Read-depth histogram (reads per genome window; blue: median read-depth, yellow: half read-depth, red: very low/high read-depth) (ii), and SNP density (SNPs per genome window; blue: low SNP density, red: high SNP density) (iii). There were 6.21, 6.38, and 6.36 million filtered heterozygous SNP calls for the draft, Purge Haplotigs-processed, and Redundans-processed assemblies respectively.
